# Supplementary material
Source: HighWire-hosted journal article supplement (https://www.jpn.ca/highwire/filestream/90734/field_highwire_adjunct_files/0/JPN-220199-at-1.pdf)
Supplement: JPN-220199-at-1.pdf [file JPN-220199-at-1.pdf]

**Appendix 1** to Bacellar IOL, Morin G, Daniels S. Opening up mental health research. *J Psychiatry Neurosci* 2023. Copyright © 2023 The Author(s) or their employer(s).

To receive this resource in an accessible format, please contact us at [cmajgroup@cmaj.ca](mailto:cmajgroup@cmaj.ca).

DOI: 10.1503/jpn.220199

*Online appendices are unedited and posted as supplied by the authors.*

## SUPPLEMENTARY INFORMATION

### Opening up mental health research

Isabel O. L. Bacellar, PhD<sup>1</sup>, Geneviève Morin, MSc, MBA<sup>1,2</sup>, Sylvanne Daniels, PhD<sup>1,3</sup>, Gustavo Turecki, MD, PhD<sup>1,3</sup>, Lena Palaniyappan, MD, PhD<sup>1,3, a</sup>, and Martin Lepage, PhD<sup>\*1,3, a</sup>

<sup>1</sup>Douglas Research Centre, Montreal, Canada

<sup>2</sup>Montreal West Island Integrated University Health and Social Services Centre, Montreal, Canada

<sup>3</sup>Department of Psychiatry, McGill University, Montreal, Canada

<sup>a</sup> Martin Lepage and Lena Palaniyappan should be considered joint senior authors

\*Corresponding author: **Martin Lepage, PhD**, Douglas Research Centre, Frank B. Common

Pavilion, F-1143, 6875 LaSalle Blvd., Montreal, Quebec H4H 1R3, Canada; Phone: (514) 761-6131 ext. 4393; Fax: (514) 888-4099; E-mail: [martin.lepage@mcgill.ca](mailto:martin.lepage@mcgill.ca)

## **1. Open Science needs assessment methodology**

The main source of inspiration for the Douglas Research Centre's (Douglas) Open Science needs assessment was a consultation performed by The Neuro (Montreal Neurological Institute-Hospital). Their study reports on semi-structured interviews with 21 researchers and one representative of their Research Ethics Board, conducted in 2015 to identify experiences, opinions, and concerns regarding Open Science (1).

To broaden our observations beyond researchers, we expanded our consultation to two other classes of internal stakeholders: research staff members and students involved in research activities, including graduate students and postdoctoral fellows. In total, we interviewed ten researchers, four staff members, and four students. Most of these researchers are also leaders of one of our four research divisions, five theme-based groups, or five core facilities. In these cases, the needs assessment consultation questions were extended to capture not only the needs of individual researchers and their research groups, but also of the internal organizations they represent. We aimed for our interviews to be casual and conversational, allowing us to collect qualitative information and to build or strengthen relationships with our main stakeholders. Our interviews were led by two staff members representing the Open Science team, and they were guided by the list of questions provided in Section 2.

## **Reference**

**Appendix 1** to Bacellar IOL, Morin G, Daniels S. Opening up mental health research. *J Psychiatry Neurosci* 2023. Copyright © 2023 The Author(s) or their employer(s).

To receive this resource in an accessible format, please contact us at [cmajgroup@cmaj.ca](mailto:cmajgroup@cmaj.ca).

DOI: 10.1503/jpn.220199

*Online appendices are unedited and posted as supplied by the authors.*

(1) Poupon V, Seyller A, Edwards A, Rouleau G. Open Science at the Montreal Neurological Institute and Hospital: the buy-in process. *Gates Open Research* 2020, 4:15.

## **2. Open Science needs assessment guiding questions**

The Open Science needs assessment questions bellow were tailored to the research environment of the Douglas Research Centre. Names of local health authorities and universities may need to be adapted to local context. This resource is also available through our OSF project (<https://osf.io/f7xpy/> - DOI: 10.17605/osf.io/f7xpy), which will be frequently updated with tools supporting the development of Open Science initiatives.

*The resource below may be shared in accordance with the CC BY-NC-SA 4.0 License. This license allows re-users to distribute, remix, adapt, and build upon the material in any medium or format for noncommercial purposes only, and only so long as attribution is given to the creator. If you remix, adapt, or build upon the material, you must license the modified material under identical terms.*

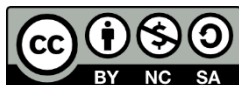

DOI: 10.1503/jpn.220199

*Online appendices are unedited and posted as supplied by the authors.*

## **Questionnaire**

NOTE: if the interviewee is a representative of any internal organizations or core facilities, extend questions to the organization or core facility.

- 1) Describe your current and upcoming projects involving Open Science or overall experience with Open Science. Which open science practices are involved in these projects?
- 2) If not mentioned previously, do you have experience with and/or are responsible for:
  - a) Sharing and storing data, even if manually?
  - b) Sharing protocol, codes, or reagents, internally or externally?
  - c) Choosing data formats, software, and open data sharing platforms? Do you have autonomy for choices?
  - d) Submitting articles, including Open Access publishing?
  - e) Developing data management plans for grants or projects?
  - f) Digital mental health projects?
  - g) Training individuals, including on Open Science and research data management?
  - h) Maintaining social media accounts?
- 3) How is the workload associated with Open Science activities in your group? Do Open Science activities increase or decrease your workload short- vs. long-term?
- 4) What motivates you to participate in Open Science? Are there any incentives from e.g., your university or funders? Do you believe Open Science activities benefit your career prospects?

DOI: 10.1503/jpn.220199

*Online appendices are unedited and posted as supplied by the authors.*

- 5) Who usually initiates the adoption of new Open Science practices: researchers, research staff, students, or a combination of them?
- 6) Where do you find knowledge about and support for Open Science practices? Do you benefit from internal or external sources?
- 7) Where do you learn about legal and ethical considerations for research (including intellectual property protection, data licensing, publishing agreements)?
- 8) Do you deal with consenting and enrolling research participants? If yes, have you gotten any feedback on the participants' interest in openly sharing their results? Do you have any experience with open data sharing clauses in consent forms?
- 9) What is the level of openness of your collaborators? Do you collaborate with the Montreal West Island Integrated University Health and Social Services Centre and their clinical teams?
- 10) Are you familiar with Open Access publishing mandates from funders? Are you familiar with green Open Access?
- 11) Are you familiar with research data management mandates from funders? What is your role in that?
- 12) What are your current and desired systems for research data management, including data storage and data sharing? If possible, specify data formats and the size of required storage. Would you be willing to migrate to or collaborate with an in-house solution?
- 13) For platforms: How do you ensure data and metadata quality? Is each researcher responsible for their own data? Does the platform itself have a data management plan?
- 14) Do you commercialize data or services (or do you have plans to)?

**Appendix 1** to Bacellar IOL, Morin G, Daniels S. Opening up mental health research. *J Psychiatry Neurosci* 2023. Copyright © 2023 The Author(s) or their employer(s).

To receive this resource in an accessible format, please contact us at [cmajgroup@cmaj.ca](mailto:cmajgroup@cmaj.ca).

DOI: 10.1503/jpn.220199

*Online appendices are unedited and posted as supplied by the authors.*

15) Are you familiar with McGill Library's support services for Open Access publishing and research data management?

16) How can we help you in the next 6 months?

17) Are there members in your team or other researchers to whom we should speak?
